# Supplementary material for: Broken detailed balance and entropy production in the human brain
Source: PubMed Central journal article supplement — Proc Natl Acad Sci U S A. 2021 Nov 17;118(47):e2109889118. doi: 10.1073/pnas.2109889118 (PMC8617485; doi:10.1073/pnas.2109889118), 2021-11-17
Supplement: pnas.2109889118.sapp.pdf [file pnas.2109889118.sapp.pdf]

# Supporting Information

## ***Broken detailed balance and entropy production in the human brain***

Christopher W. Lynn<sup>1,2</sup>, Eli J. Cornblath<sup>3,4</sup>, Lia Papadopoulos<sup>5</sup>, Maxwell A. Bertolero<sup>4</sup>, and Danielle S. Bassett<sup>3,6,7,8,9,10,\*</sup>

<sup>1</sup>*Initiative for the Theoretical Sciences, Graduate Center, City University of New York, New York, NY 10016, USA*

<sup>2</sup>*Joseph Henry Laboratories of Physics, Princeton University, Princeton, NJ 08544, USA*

<sup>3</sup>*Department of Bioengineering, School of Engineering & Applied Science, University of Pennsylvania, Philadelphia, PA 19104, USA*

<sup>4</sup>*Department of Neuroscience, Perelman School of Medicine, University of Pennsylvania, Philadelphia, PA 19104, USA*

<sup>5</sup>*Institute of Neuroscience, University of Oregon, Eugene, Oregon 97403, USA*

<sup>6</sup>*Department of Electrical & Systems Engineering, School of Engineering & Applied Science, University of Pennsylvania, Philadelphia, PA 19104, USA*

<sup>7</sup>*Department of Physics & Astronomy, College of Arts & Sciences, University of Pennsylvania, Philadelphia, PA 19104, USA*

<sup>8</sup>*Department of Neurology, Perelman School of Medicine, University of Pennsylvania, Philadelphia, PA 19104, USA*

<sup>9</sup>*Department of Psychiatry, Perelman School of Medicine, University of Pennsylvania, Philadelphia, PA 19104, USA*

<sup>10</sup>*Santa Fe Institute, Santa Fe, NM 87501, USA*

## Contents

|    |                                                                          |           |
|----|--------------------------------------------------------------------------|-----------|
| 23 | <b>1 Introduction</b>                                                    | <b>3</b>  |
| 24 | <b>2 Visualizing flux currents</b>                                       | <b>4</b>  |
| 25 | <b>3 Low-dimensional embedding using PCA</b>                             | <b>4</b>  |
| 26 | <b>4 The brain operates at a stochastic steady state</b>                 | <b>5</b>  |
| 27 | <b>5 Shuffling time-series restores detailed balance</b>                 | <b>7</b>  |
| 28 | <b>6 Estimating entropy production using hierarchical clustering</b>     | <b>7</b>  |
| 29 | <b>7 Choosing the number of coarse-grained states</b>                    | <b>10</b> |
| 30 | <b>8 Coarse-grained states and transition matrices</b>                   | <b>11</b> |
| 31 | <b>9 Flux networks: Visualizing fluxes between coarse-grained states</b> | <b>13</b> |
| 32 | <b>10 Entropy production in individual humans</b>                        | <b>15</b> |
| 33 | <b>11 Testing the Markov assumption</b>                                  | <b>17</b> |
| 34 | <b>12 Varying the number of coarse-grained states</b>                    | <b>19</b> |
| 35 | <b>13 Robustness to head motion, signal variance, and block length</b>   | <b>21</b> |
| 36 | <b>14 Comparing against phase-randomized surrogate data</b>              | <b>22</b> |
| 37 | <b>15 Data processing</b>                                                | <b>23</b> |
| 38 | <b>References</b>                                                        | <b>26</b> |

# 1 Introduction

39

40 In this Supporting Information, we provide extended analysis and discussion to support the results  
41 presented in the main text. In Sec. 2, we describe how the flux vectors (in Figs. 1D-E and 2C  
42 of the main text) are calculated and illustrated. In Sec. 3, we show that principal component  
43 analysis (PCA) provides a natural low-dimensional embedding of neural dynamics that we can use  
44 to visualize fluxes between brain states. In Sec. 4, we show that, although the brain functions  
45 out of equilibrium, it does operate at a steady state. Demonstrating that the brain operates at a  
46 non-equilibrium steady state opens the door for future investigations using tools and intuitions that  
47 have recently been generalized from equilibrium statistical mechanics.<sup>1-3</sup> In Sec. 5, we show that  
48 if one shuffles the order of neural time-series data (thereby destroying the arrow of time), then  
49 the fluxes between states vanish and the system returns to equilibrium. In Sec. 6, we establish  
50 that estimating entropy production using hierarchical clustering yields two desirable properties.  
51 First, because a system's entropy production can only decrease with coarse-graining,<sup>4</sup> in order  
52 to establish that a system is fundamentally out of equilibrium, one must simply demonstrate that  
53 the coarse-grained entropy production is significantly greater than zero. Second, by defining the  
54 clusters hierarchically,<sup>5</sup> we prove that the estimated entropy production becomes more accurate as  
55 the number of clusters increases. In Sec. 7, we demonstrate how to choose the number of clusters  
56 (or coarse-grained states)  $k$  when estimating the entropy production. In Sec. 8, we illustrate the  
57  $k = 8$  coarse-grained states analyzed in the main text, and demonstrate that the brain operates at  
58 a steady state across all of the cognitive tasks. In Sec. 9, we present the fluxes between coarse-  
59 grained states in the neural dynamics as directed networks, which we refer to as flux networks.  
60 We demonstrate that these flux networks vary in structure across different cognitive tasks. In Sec.  
61 10, we estimate the entropy production of individual humans and demonstrate that, even at the  
62 individual level, physical and cognitive exertion yields increases in broken detailed balance. In  
63 Secs. 11-13, we show that the entropy production results in the main text do not depend on the  
64 assumption that the neural dynamics are Markovian (Sec. 11), are robust to reasonable variation  
65 in the number of coarse-grained states  $k$  (Sec. 12), and cannot be explained by head movement  
66 within the scanner, variance in the neural time-series, nor the lengths of blocks in different tasks

67 (Sec. 13). In Sec. 14, we compare our main results against phase-randomized surrogate data.  
 68 Finally, in Sec. 15, we detail how the neural data was processed.

## 69 2 Visualizing flux currents

70 In order to visualize net fluxes in neural dynamics, we project the dynamics onto the first two  
 71 principal components and employ a technique known as probability flux analysis.<sup>6</sup> The net flux of  
 72 transitions from a given state  $(x, y)$  to its neighboring states can be visualized using the flux vector

$$\mathbf{u}(x, y) = \frac{1}{2} \begin{pmatrix} \omega_{(x-1,y),(x,y)} + \omega_{(x,y),(x+1,y)} \\ \omega_{(x,y-1),(x,y)} + \omega_{(x,y),(x,y+1)} \end{pmatrix}. \quad (\text{S1})$$

73 To compute the errors for a given flux vector  $\mathbf{u}(\mathbf{x})$ , we calculate the covariance matrix  $\text{Cov}(u_1(\mathbf{x}), u_2(\mathbf{x}))$   
 74 by averaging over 100 bootstrapped trajectories (see Materials and Methods in the main text).  
 75 Then, we illustrate the errors by plotting an ellipse whose axes are aligned with the eigenvectors  
 76 of the covariance matrix and whose radii are equal to twice the square root of the corresponding  
 77 eigenvalues (Fig. S1).

## 78 3 Low-dimensional embedding using PCA

79 In order to visualize net fluxes between states in a complex system, we must project the dynamics  
 80 onto two dimensions. While any pair of dimensions can be used to probe for broken detailed bal-  
 81 ance, a natural choice is the first two principal components of the time-series data. Indeed, principal

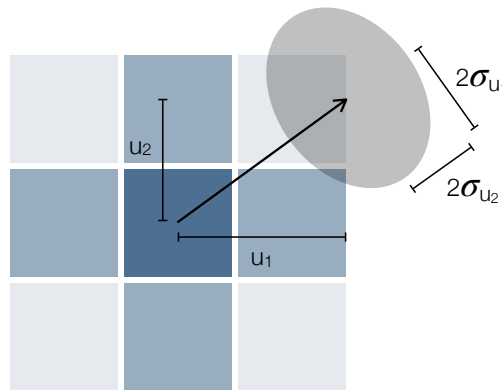

**Supporting Fig. 1 | Visualizing flux vectors.** Schematic demonstrating how we illustrate the flux of transitions through a state (vector) and the errors in estimating the flux (ellipse).

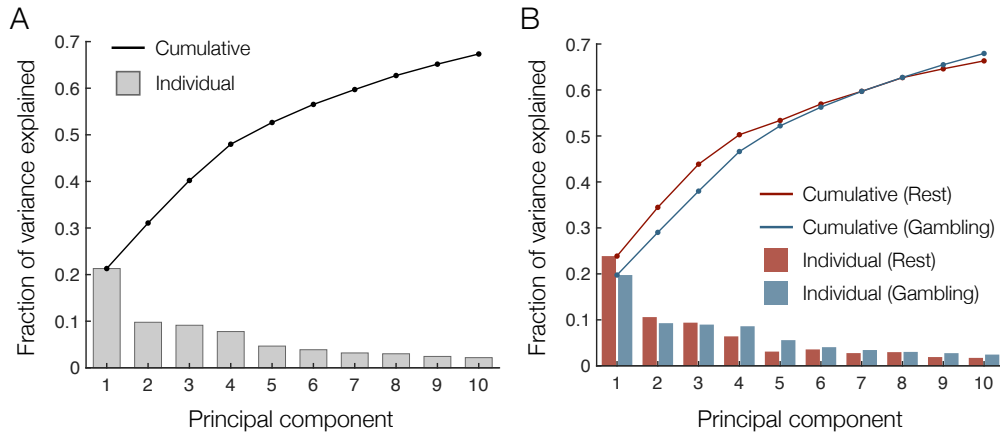

**Supporting Fig. 2 | PCA reveals low-dimensional embedding of neural dynamics.** (A) Cumulative fraction of variance explained by first ten principal components (line) and explained variance for each individual principal component (bars) in the combined rest and gambling data. (B) For the same principal components (calculated for the combined rest and gambling data), we plot the cumulative fraction of variance explained (lines) and individual explained variance (bars) for the rest (red) and gambling (blue) data.

82 component analysis has been widely used to uncover low-dimensional embeddings of large-scale  
 83 neural dynamics.<sup>7,8</sup> Combining the time-series data from the rest and gambling task scans (that is,  
 84 the data studied in Fig. 1 in the main text), we find that the first two principal components capture  
 85 over 30% of the total variance in the observed recordings (Fig. S2A), thereby comprising a natural  
 86 choice for two-dimensional projections. Moreover, we confirm that the projected dynamics cap-  
 87 ture approximately the same amount of variance in both the rest and gambling tasks, confirming  
 88 that PCA is not overfitting the neural dynamics in one task or another (Fig. S2B).

#### 89 4 The brain operates at a stochastic steady state

90 In the main text, we established that the brain breaks detailed balance (Figs. 1 and 4). Yet we  
 91 did not clarify whether this broken detailed balance arises from changes in the state probabilities  
 92 themselves, or whether these probabilities are time-invariant and therefore the brain operates at a  
 93 non-equilibrium steady state. Notably, some of the tools and intuitions developed in traditional  
 94 statistical mechanics to study equilibrium systems have recently been generalized to systems that  
 95 operate at non-equilibrium steady states.<sup>1</sup> For example, Evans *et al.* generalized the second law

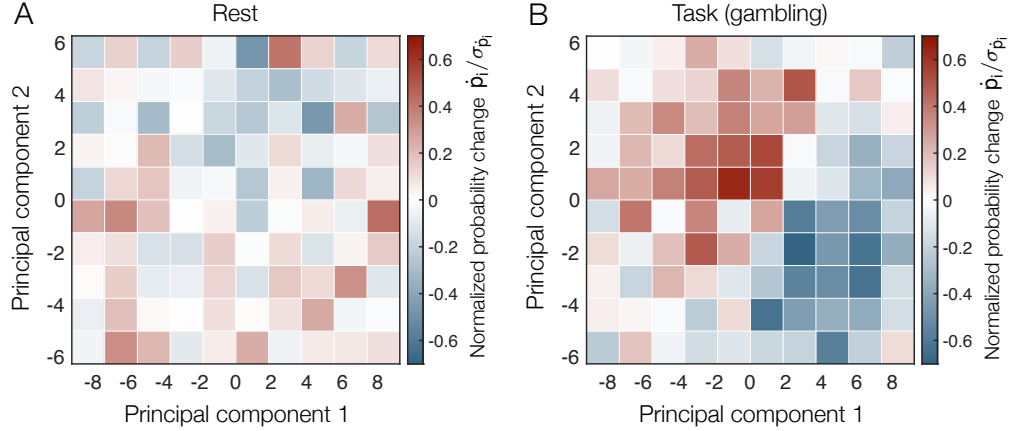

**Supporting Fig. 3 | Small changes in state probabilities imply steady-state dynamics.** Change in state probabilities  $\dot{p}_i$ , normalized by the standard deviation  $\sigma_{\dot{p}_i}$ , plotted as a function of the first two principal components at rest (A) and during the gambling task (B).

96 of thermodynamics to non-equilibrium steady-state systems by discovering the (steady state) fluctuation theorem.<sup>2</sup> More recently, Dieterich *et al.* showed that, by mapping their dynamics to an equilibrium system at an effective temperature, some non-equilibrium steady-state systems are governed by a generalization of the fluctuation-dissipation theorem.<sup>3</sup> Thus, it is both interesting and practical to investigate whether the brain operates at a non-equilibrium steady state. We remark that by “non-equilibrium” we refer to the breaking of detailed balance at large scales, not the obvious non-equilibrium nature of the brain at the cellular and molecular scales.

103 Previous analyses of fMRI time-series suggest that the brain indeed operates at steady state.<sup>9</sup> To test for steady state in our data, we must examine whether the state probabilities are stationary in time; that is, letting  $p_i$  denote the probability of state  $i$ , we must determine whether  $\dot{p}_i = dp_i/dt = 0$  for all states  $i$ . The change in the probability of a state is equal to the net rate at which transitions flow into versus out of a state. For the two-dimensional dynamics studied in Fig. 1 in the main text, this relation takes the form

$$\dot{p}_{(x,y)} = \omega_{(x-1,y),(x,y)} - \omega_{(x,y),(x+1,y)} + \omega_{(x,y-1),(x,y)} - \omega_{(x,y),(x,y+1)}, \quad (\text{S2})$$

109 where  $\omega_{ij} = (n_{ij} - n_{ji})/t_{\text{tot}}$  is the flux rate from state  $i$  to state  $j$ ,  $n_{ij}$  is the number of observed transitions  $i \rightarrow j$ , and  $t_{\text{tot}}$  is the temporal duration of the time-series.<sup>6</sup>

111 Here, we calculate the changes in state probabilities for both the rest and gambling scans.  
112 Across all states in both task conditions, we find that these changes are indistinguishable from  
113 zero when compared to statistical noise (Fig. S3). Specifically, the changes in state probabilities  
114 are much less than twice their standard deviations, indicating that they cannot be significantly  
115 distinguished from zero with a  $p$ -value less than 0.05. In Sec. 8, we confirm the same result (that  
116 the brain operates at steady-state) for the coarse-grained states analyzed in Fig. 4 in the main  
117 text. Combined with the findings in the main text, the stationarity of the neural state probabilities  
118 demonstrates that the brain operates at a non-equilibrium steady-state.

## 119 **5 Shuffling time-series restores detailed balance**

120 In Fig. 1 in the main text, we demonstrate that the brain breaks detailed balance by exhibiting  
121 net fluxes between states. Here we demonstrate that if the temporal order of the neural data is  
122 destroyed (say, by shuffling the time-series), then the fluxes vanish and detailed balance is restored.  
123 Specifically, for both the rest and gambling task scans, we generate 100 surrogate time-series  
124 with the order of the data randomly shuffled. Averaging across these shuffled time-series, we  
125 find that the fluxes between states are vanishingly small compared to statistical noise (Fig. S4),  
126 thus illustrating that the system has returned to detailed balance. We remark that other common  
127 surrogate data techniques, such as the random phases and amplitude adjusted Fourier transform  
128 surrogates, are not applicable here because they preserve the temporal structure of the time-series  
129 data.<sup>10</sup>

## 130 **6 Estimating entropy production using hierarchical clustering**

131 Complex systems are often high-dimensional, with the number of possible states or configurations  
132 growing exponentially with the size of the system. In order to estimate the information entropy pro-  
133 duction of a complex system (Eq. 1 in the main text), we must reduce the number of states through  
134 the use of coarse-graining, or dimensionality reduction, techniques. Interestingly, the entropy pro-  
135 duction admits a number of strong properties under coarse-graining.<sup>4,11–13</sup> Of particular interest is  
136 the fact that the entropy production can only decrease under coarse-graining.<sup>4</sup> Specifically, given  
137 two descriptions of a system, a “microscopic” description with states  $\{i\}$  and a “macroscopic”

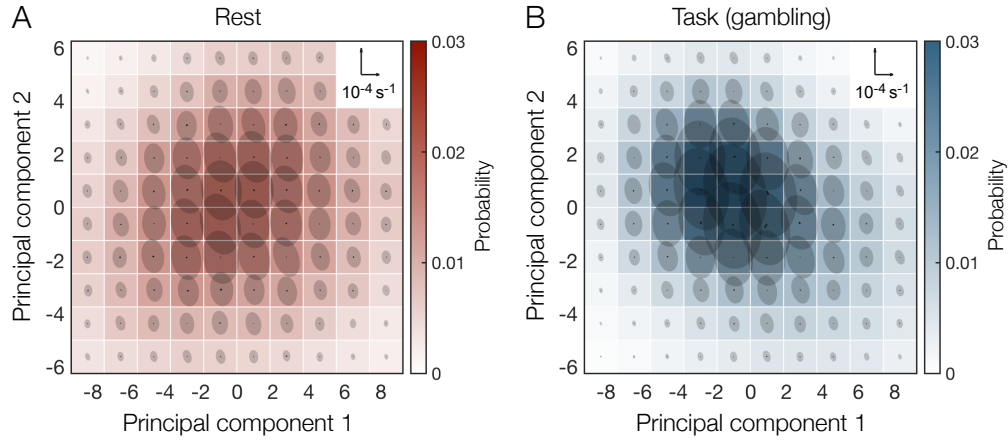

**Supporting Fig. 4 | Shuffled data do not exhibit fluxes between neural states.** Probability distribution (color) and nearly imperceivable fluxes between states (arrows) for neural dynamics, which are shuffled and projected onto the first two principal components, both at rest (A) and during a gambling task (B). The flux scale is indicated in the upper right, and the disks represent two-standard-deviation confidence intervals that arise due to finite data (see Materials and Methods in the main text).

138 description with states  $\{i'\}$ , we say that the second description is a coarse-graining of the first  
 139 if there exists a surjective map from the microstates  $\{i\}$  to the macrostates  $\{i'\}$  (that is, if each  
 140 microstate  $i$  maps to a unique macrostate  $i'$ ; Fig. S5A). Given such a coarse-graining, Esposito  
 141 showed<sup>4</sup> that the entropy production of the macroscopic description  $\dot{S}'$  can be no larger than that  
 142 of the microscopic description  $\dot{S}$ ; in other words, the coarse-grained entropy production provides  
 143 a lower bound for the original value, such that  $\dot{S}' \leq \dot{S}$ .

144 The monotonic decrease of the entropy production under coarse-graining implies two desir-  
 145 able mathematical results. First, if one finds that any coarse-grained description of a system breaks  
 146 detailed balance (that is, if the entropy production at any level of coarse-graining is significantly  
 147 greater than zero), then one has immediately established that the full microscopic system breaks  
 148 detailed balance. Thus, even without knowledge of the microscopic non-equilibrium processes at  
 149 play, one can establish that the brain fundamentally breaks detailed balance at small scales simply  
 150 by observing violations of detailed balance at large scales (Figs. 1 and 4 in the main text).

151 By extending this logic, here we show that hierarchical clustering provides systematic im-



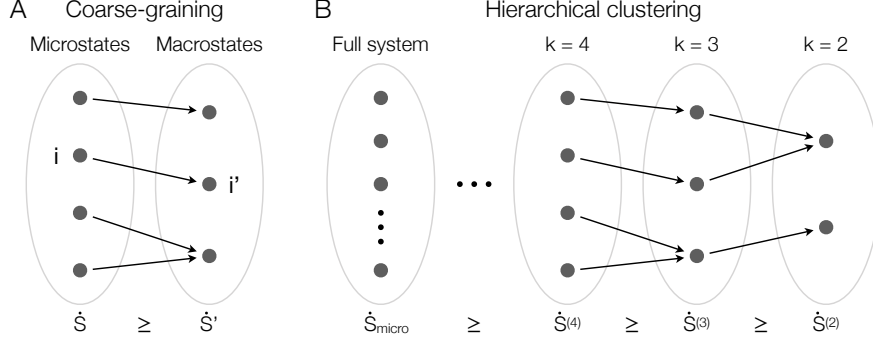

**Supporting Fig. 5 | Hierarchy of lower bounds on entropy production.** (A) Coarse-graining is defined by a surjective map from a set of microstates  $\{i\}$  to a set of macrostates  $\{i'\}$ . Under coarse-graining the entropy production cannot increase. (B) In hierarchical clustering, states are iteratively combined to form new coarse-grained states (or clusters). Each iteration defines a coarse-graining from  $k$  states to  $k - 1$  states, thereby forming a hierarchy of lower bounds on the entropy production.

152 improvements to the entropy production estimates. In hierarchical clustering, each cluster (or coarse-  
 153 grained state) at one level of description (with  $k$  clusters) maps to a unique cluster at the level below  
 154 (with  $k - 1$  clusters; Fig. S5B). This process can either be carried out by starting with a large num-  
 155 ber of clusters and then iteratively picking pairs of clusters to combine (known as agglomerative  
 156 clustering), or by starting with a small number of clusters and then iteratively picking one cluster to  
 157 split into two (known as divisive clustering, which we employ in our analysis).<sup>14</sup> In both cases, the  
 158 mapping from  $k$  clusters to  $k - 1$  clusters is surjective, thereby representing a coarse-graining of  
 159 the system, as defined previously. Thus, letting  $\dot{S}^{(k)}$  denote the entropy production estimated with  
 160  $k$  clusters, hierarchical clustering defines a hierarchy of lower bounds on the microscopic entropy  
 161 production  $\dot{S}_{\text{micro}}$ :

$$0 = \dot{S}^{(1)} \leq \dot{S}^{(2)} \leq \dot{S}^{(3)} \leq \dots \leq \dot{S}_{\text{micro}}. \quad (\text{S3})$$

162 This hierarchy, in turn, demonstrates that the estimated entropy production  $\dot{S}^{(k)}$  becomes larger  
 163 (and thus more accurate) with increasing  $k$ .

164 We remark that the discussion above neglects finite data effects. We recall that estimating the  
 165 entropy production requires first estimating the transition probabilities  $P_{ij}$  from state  $i$  to state  $j$ .  
 166 This means that for Markov systems with  $k$  clusters, one must estimate  $k^2$  different probabilities.

167 Thus, while increasing  $k$  improves the accuracy of the estimated entropy production in theory, in  
168 practice increasing  $k$  eventually leads to sampling issues that decrease the accuracy of the estimate.  
169 Given these competing influences, when analyzing real data the goal should be to choose  $k$  such  
170 that it is as large as possible while still providing accurate estimates of the transition probabilities.  
171 We discuss a systematic strategy for choosing  $k$  in the following section.

## 172 **7 Choosing the number of coarse-grained states**

173 As discussed above, when calculating the entropy production, we wish to choose a number of  
174 coarse-grained states  $k$  that is as large as possible while still arriving at an accurate estimate of the  
175 transition probabilities. One simple condition for estimating each transition probability  $P_{ij}$  is that  
176 we observe the transition  $i \rightarrow j$  at least once in the time-series. For all of the different tasks, Fig.  
177 S6A shows the fraction of the  $k^2$  state transitions that are left unobserved after coarse-graining with  
178  $k$  clusters. We find that  $k = 8$  is the largest number of clusters for which the fraction of unobserved  
179 transitions equals zero (within statistical errors) for all tasks; that is, the largest number of clusters  
180 for which all state transitions across all tasks were observed at least once. For this reason, we use  
181  $k = 8$  coarse-grained states to analyze the brain’s entropy production (Fig. 4 in the main text).

182 Interestingly, we find that  $k = 8$  coarse-grained states is a good choice for two additional  
183 reasons. The first comes from studying the amount of variance explained by  $k$  clusters (Fig. S6B).  
184 We find that the increase in explained variance from  $k - 1$  to  $k$  clusters is roughly constant for  
185  $k = 3$  and 4, then  $k = 5$  to 8, and then  $k = 9$  to 16. This pattern means that  $k = 4, 8,$  and 16  
186 are natural choices for the number of coarse-grained states, since any further increase (say from  
187  $k = 8$  to 9) will yield a smaller improvement in explained variance. Similarly, the second reason  
188 for choosing  $k = 8$  comes from studying the average distance between states within a cluster,  
189 which is known as the dispersion (Fig. S6C). Intuitively, a coarse-grained description with low  
190 dispersion provides a good fit of the observed data. Similar to the explained variance, we find that  
191 the decrease in dispersion from  $k - 1$  to  $k$  clusters is nearly constant for  $k = 3$  to 4, then  $k = 5$   
192 to 8, and then  $k = 9$  to 16, once again suggesting that  $k = 4, 8,$  and 16 are natural choices for the  
193 number of clusters. Together, these results demonstrate that the coarse-grained description with

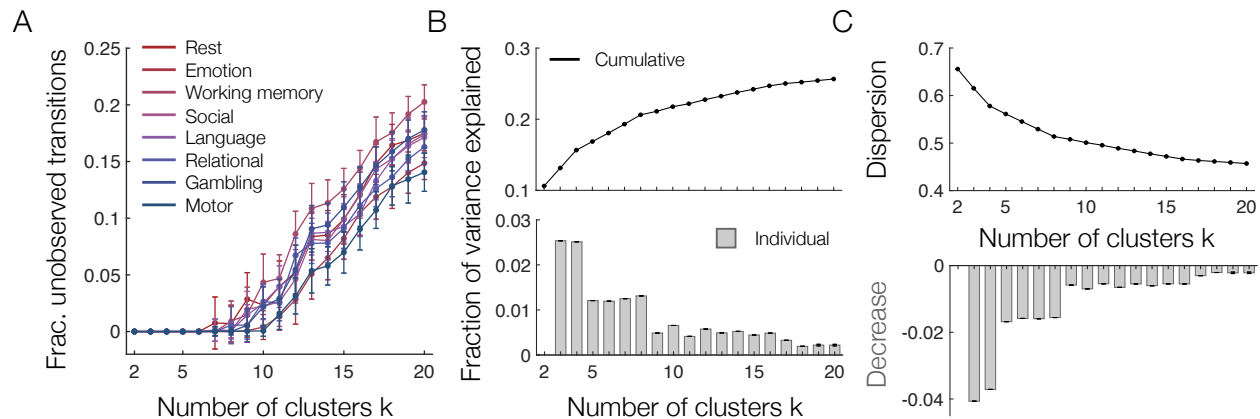

**Supporting Fig. 6 | Choosing the number of coarse-grained states  $k$ .** (A) Fraction of the  $k^2$  state transitions that remain unobserved after hierarchical clustering with  $k$  clusters for the different tasks. Error bars represent two-standard-deviation confidence intervals that arise due to finite data. (B) Percent variance explained (top) and the increase in explained variance from  $k - 1$  to  $k$  clusters (bottom) as functions of  $k$ . (C) Dispersion, or the average distance between data points within a cluster (top), and the decrease in dispersion from  $k - 1$  to  $k$  clusters (bottom) as functions of  $k$ .

194  $k = 8$  states provides a good fit to the neural time-series data while still allowing for an accurate  
 195 estimate of the entropy production in each task.

## 196 8 Coarse-grained states and transition matrices

197 We are now prepared to examine the  $k = 8$  coarse-grained neural states and the transitions between  
 198 them. In Fig. S7A, we project each of the eight coarse-grained states onto seven pre-defined  
 199 cognitive systems.<sup>15</sup> We find that each of the states corresponds to high-amplitude activity in one  
 200 or two systems, and we label each state based on this high-amplitude activity.

201 We can now measure the rate of transitions between the coarse-grained states during different  
 202 cognitive tasks (Fig. S7B-I, left). We note that the transition rates are given simply by dividing  
 203 the transition probabilities  $P_{ij}$  by the fMRI repetition time  $\Delta t = 0.72$  s. At rest, we find that the  
 204 transition rates appear nearly symmetric, indicating that the brain is close to detailed balance (Fig.  
 205 S7B, left). By contrast, careful examination of the transition rates during the seven cognitive tasks  
 206 reveals asymmetries, illustrating broken detailed balance (Fig. S7C-I, left).

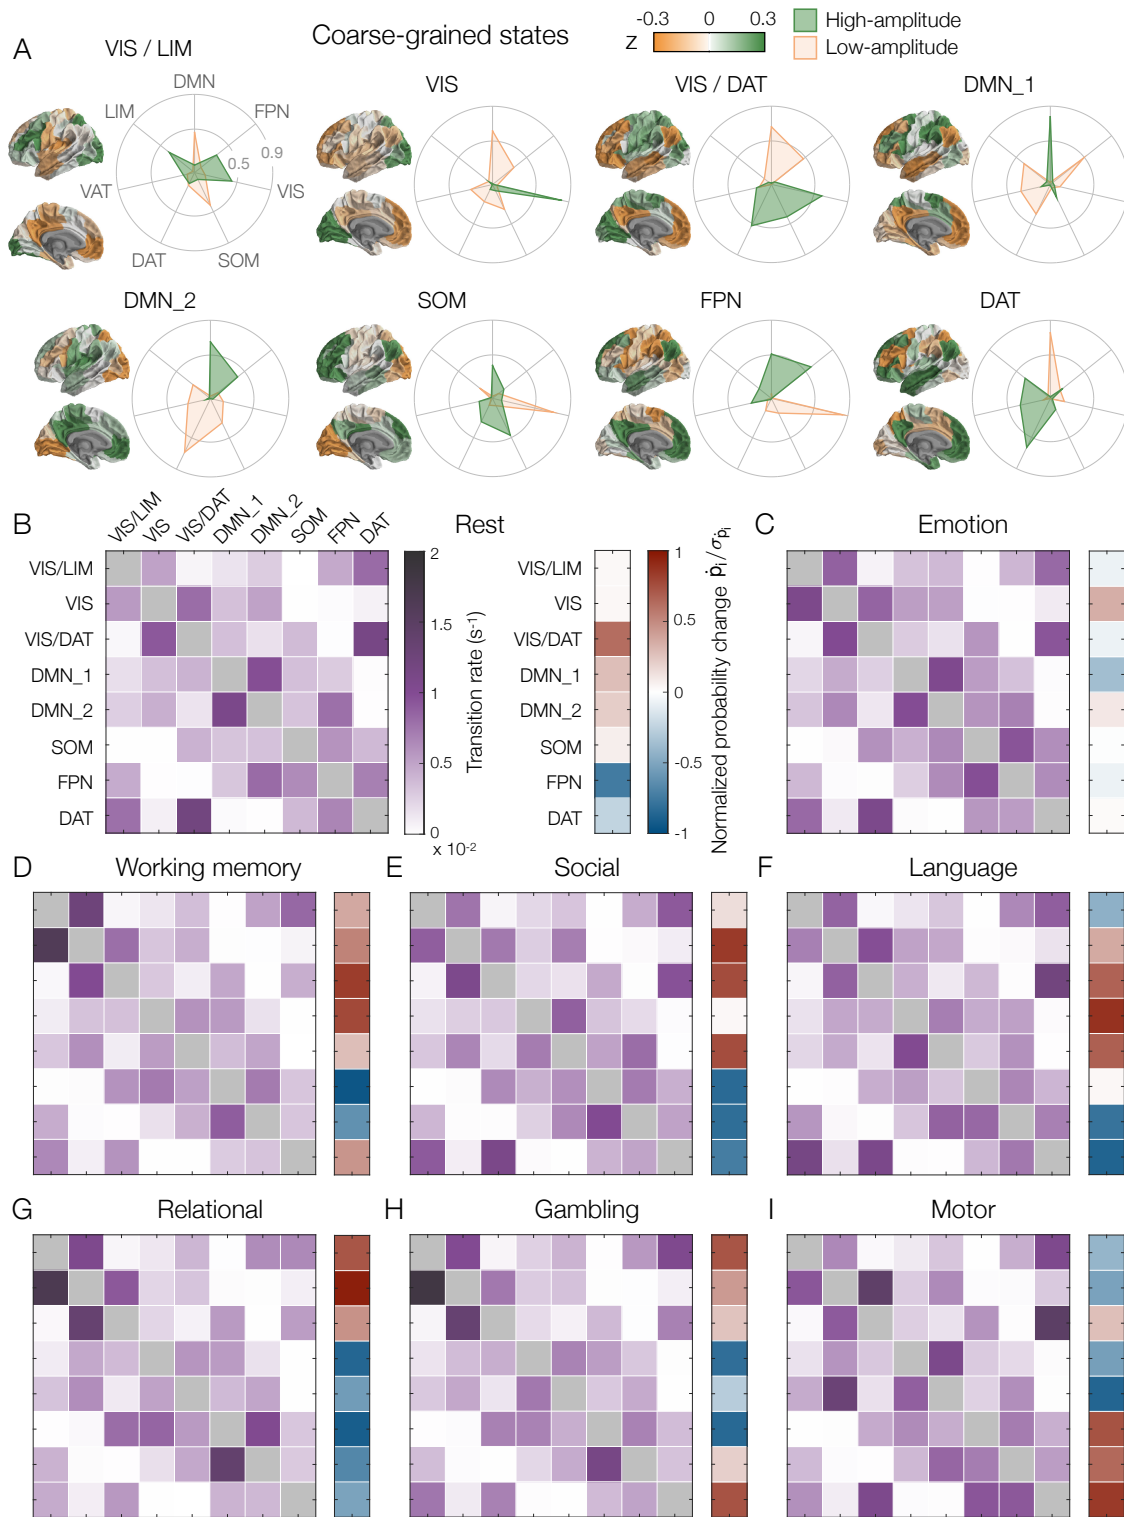

**Supporting Fig. 7 | Transitions between coarse-grained neural states.** (A) Coarse-grained neural states calculated using hierarchical clustering ( $k = 8$ ), with surface plots indicating the

$z$ -scored activation of different brain regions. For each state, we calculate the cosine similarity between its high-amplitude (green) and low-amplitude (orange) components and seven pre-defined neural systems:<sup>15</sup> default mode (DMN), frontoparietal (FPN), visual (VIS), somato-motor (SOM), dorsal attention (DAT), ventral attention (VAT), and limbic (LIM). We label each state according to its largest high-amplitude cosine similarities. (B-I) Transition rates (left) between each of the eight coarse-grained states and the changes in state probabilities  $\dot{p}_i$  normalized by their standard deviations  $\sigma_{\dot{p}_i}$  (right) at rest (B) and during seven cognitive tasks: emotional processing (C), working memory (D), social inference (E), language processing (F), relational matching (G), gambling (H), and motor execution (I). Transition rates are computed by dividing the transition probabilities  $P_{ij}$  by the fMRI repetition time  $\Delta t = 0.72$  s. Across all panels, averages and standard deviations are computed over 100 bootstrap samples.

207 Given the transition rates, we can now determine whether the brain operates at steady state.  
 208 We note that the rate of change of the state probability  $p_i$  is given by

$$\dot{p}_i = \frac{1}{\Delta t} \sum_j (P_{ji} - P_{ij}). \quad (\text{S4})$$

209 Computing the change  $\dot{p}_i$  in the probability of each state in Fig. S7A, and normalizing by the  
 210 standard deviation  $\sigma_{\dot{p}_i}$  (computed over 100 bootstrap samples), we are able to determine whether  
 211 any of the state probabilities vary significantly in time. Across all states in all tasks, we find that  
 212 the changes in state probabilities are much less than twice their standard deviations (Fig. S7B-I,  
 213 right). We therefore conclude, at least at this coarse-grained level, that the brain operates at steady  
 214 state.

## 215 9 Flux networks: Visualizing fluxes between coarse-grained states

216 In Fig. 4 in the main text, we demonstrate that the brain has the capacity to operate at a wide  
 217 range of distances from detailed balance. We did so by estimating the entropy production of neural  
 218 dynamics during different cognitive tasks. In addition to investigating the entropy production, one  
 219 can also examine the specific neural processes underlying the violations of detailed balance, which  
 220 are encoded in the fluxes between neural states. The rate of flux from state  $i$  to state  $j$  is given  
 221 by  $P_{ij} - P_{ji}$ , normalized by the fMRI repetition time  $\Delta t = 0.72$  s. In other words, the fluxes are  
 222 simply the antisymmetric parts of the transition rates in Fig. S7. We find that these fluxes are small

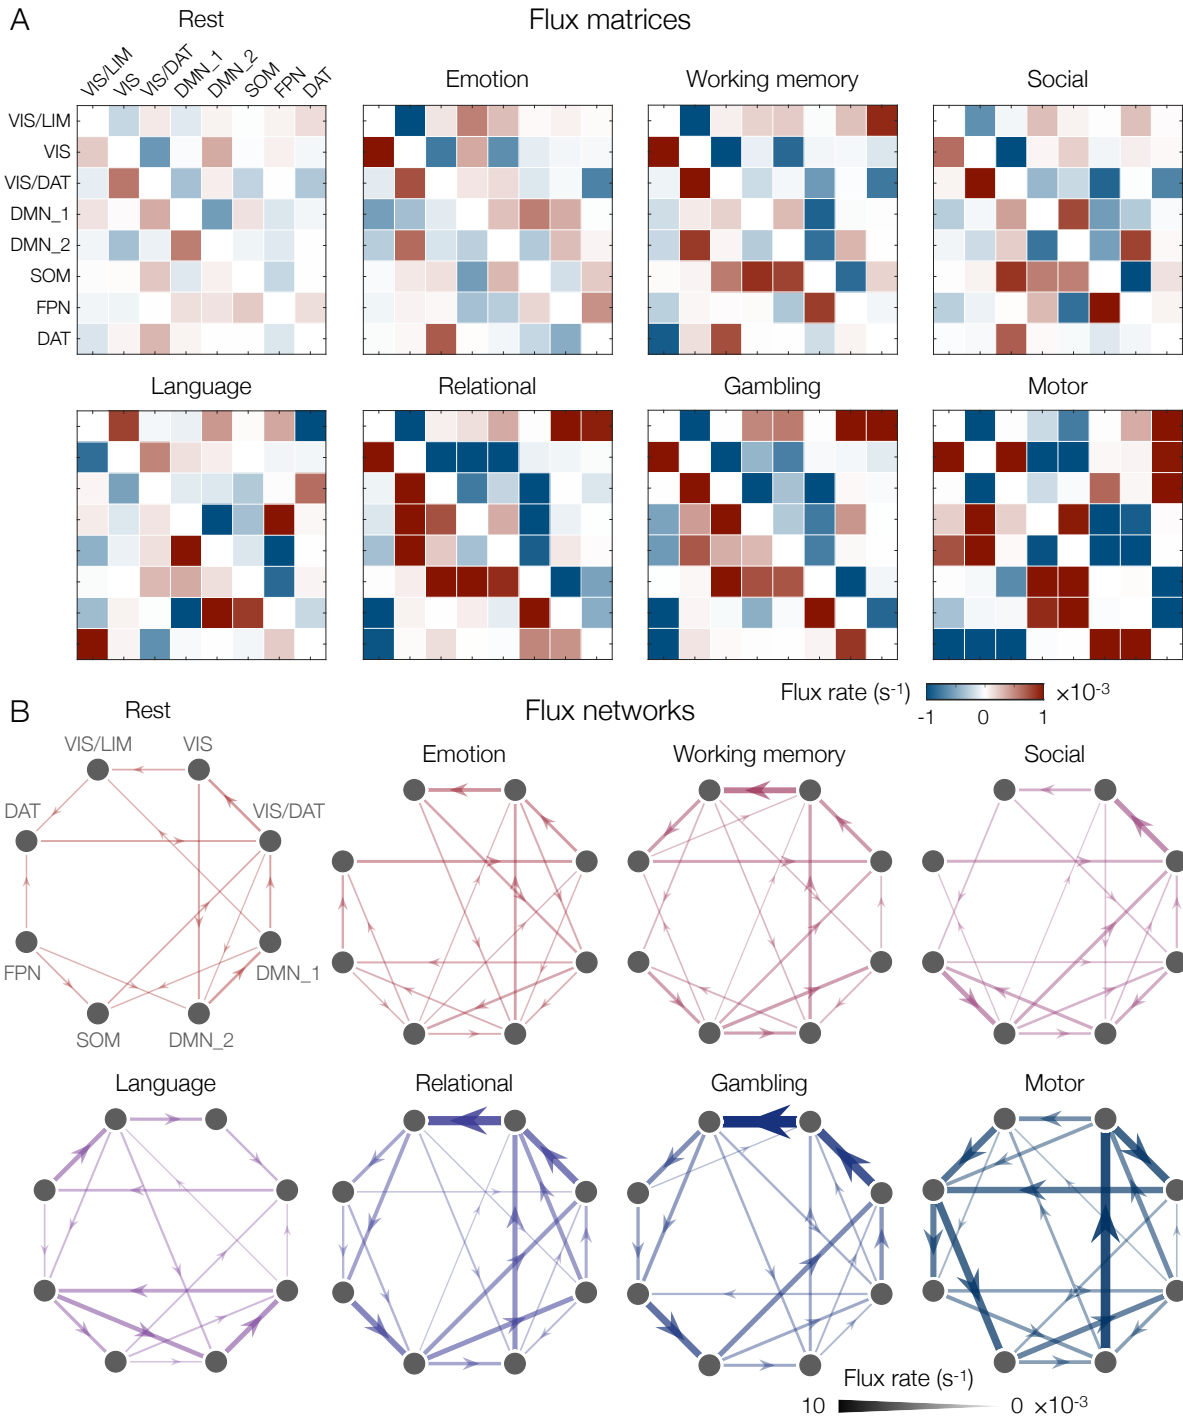

**Supporting Fig. 8 | Each cognitive task induces a unique pattern of fluxes.** (A) Flux rates between the eight coarse-grained states at rest and during the seven cognitive tasks. The flux rate from state  $i$  to state  $j$  is given by  $P_{ij} - P_{ji}$ , normalized by the fMRI repetition time  $\Delta t = 0.72$  s. (B) Flux networks illustrating the fluxes in panel A. Edge weights indicate flux

rates, and fluxes are only included if they are significant relative to the noise floor induced by finite data (one-sided  $t$ -test,  $p < 0.001$ ).

223 during rest, and much stronger during different cognitive tasks (Fig. S8A). Moreover, we find that  
224 each task induces a unique pattern of fluxes between neural states.

225 To visualize the pattern of fluxes, we introduce the concept of a flux network, with nodes rep-  
226 resenting the coarse-grained states and directed edges reflecting fluxes between states (Fig. S8B).  
227 These networks illustrate, for example, that the fluxes almost vanish during rest, thereby indicating  
228 that the brain nearly obeys detailed balance. Interestingly, in the emotion, working memory, social,  
229 relational, and gambling tasks—all of which involve visual stimuli—the strongest fluxes connect  
230 visual (VIS) states. By contrast, these fluxes are weak in the language task, which only involves  
231 auditory stimuli. Finally, in the motor task, wherein subjects are prompted to execute physical  
232 movements, the dorsal attention (DAT) state mediates fluxes between disparate parts of the net-  
233 work, perhaps reflecting the role of the DAT system in directing goal-oriented attention.<sup>16,17</sup> In this  
234 way, broken detailed balance in the brain is not driven by a single subsystem, but rather involves  
235 different combinations of subsystems depending on the specific task being performed. Examining  
236 the structural properties and cognitive neuroscientific interpretations of these flux networks is an  
237 important direction for future studies.

## 238 **10 Entropy production in individual humans**

239 Throughout the main text, we combine the neural dynamics of all subjects in order to increase the  
240 statistical power of our analyses. However, it is also interesting to investigate violations of detailed  
241 balance in individual humans. The primary difficulty in doing so lies in estimating the transition  
242 probabilities  $P_{ij}$  that are required to compute the entropy production (Eq. 1 in the main text). As  
243 discussed in Sec. 7, concatenating the neural time-series across subjects allows us to estimate the  
244 transition probabilities using  $k = 8$  coarse-grained states (Fig. S6). By contrast, when analyzing  
245 individual subjects, the largest number of states for which we observe every transition at least once  
246 in each task is  $k = 3$  (Fig. S9A).

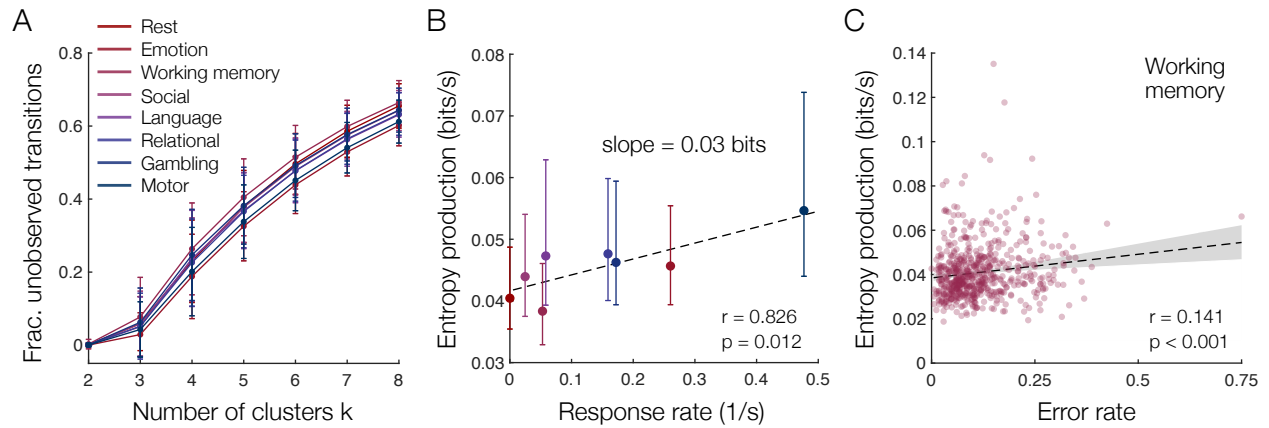

**Supporting Fig. 9 | Entropy production in individual subjects.** (A) Fraction of the  $k^2$  state transitions that remain unobserved after hierarchical clustering with  $k$  clusters for each subject and each task. Data points and error bars represent two standard deviations over the 590 different subjects. (B) Entropy production of individual subjects increases with the rate of physical responses across the different task settings (Pearson correlation  $r = 0.826$ ,  $p = 0.012$ ). Data points and error bars represent medians and interquartile ranges over the 590 subjects, and the dashed line indicates linear best fit. (C) Entropy production increases with error rate in the working memory task (Pearson correlation  $r = 0.141$ ,  $p < 0.001$ ). We confirm that relationship also holds after removing outliers (Pearson correlation  $r = 0.133$ ,  $p = 0.002$ ). Dashed line and shaded region indicate linear best fit and 95% confidence interval. To account for finite-data errors, all data points in all panels are averaged over 100 bootstrap samples for each subject and each task.

247 Performing hierarchical clustering with  $k = 3$  clusters, we estimate the entropy production  
 248 for each of the 590 subjects during each task (and rest). As in the main text (Fig. 4), we then  
 249 investigate the dependence of entropy production on physical and cognitive exertion. Across all  
 250 tasks, we find that the entropy production of neural dynamics increases significantly with the rate  
 251 of motor responses (Fig. S9B). This result confirms that the population-level relationship between  
 252 broken detailed balance and physical effort (Fig. 4B in the main text) extends to the scale of  
 253 individual humans.

254 To examine the relationship between entropy production and cognitive demand, we once  
 255 again focus on the working memory task. At the population level, we found that the high cognitive



256 load condition induces a two-fold increase in entropy production over the low load condition (Fig.  
 257 4C in the main text). However, performing the same analysis on individual subjects is infeasible,  
 258 since it requires estimating the entropy production for each subject on only a fraction of the work-  
 259 ing memory data. Instead, as a proxy for cognitive effort, we can examine the rate at which subjects  
 260 make errors. Indeed, across subjects, we find that entropy production increases significantly with  
 261 error rate (Fig. S9C), confirming that the association between broken detailed balance and cogni-  
 262 tive effort persists at the individual level. Together, these results indicate that, even for individual  
 263 humans, violations of detailed balance grow with physical exertion and cognitive demand.

## 264 11 Testing the Markov assumption

265 Thus far, we have employed a definition of entropy production (Eq. 1 in the main text) that relies  
 266 on the assumption that the time-series is Markovian; that is, that the state  $x_t$  of the system at time  
 267  $t$  depends only on the previous state  $x_{t-1}$  at time  $t - 1$ . For real time-series data, however, the  
 268 dynamics may not be Markovian, and Eq. 1 in the main text is not exact. In general, the entropy  
 269 production (per trial) is given by<sup>13,18</sup>

$$\dot{S} = \lim_{t \rightarrow \infty} \frac{1}{t} \sum_{i_1, \dots, i_{t+1}} P_{i_1, \dots, i_{t+1}} \log \frac{P_{i_1, \dots, i_{t+1}}}{P_{i_{t+1}, \dots, i_1}}, \quad (\text{S5})$$

270 where  $P_{i_1, \dots, i_{t+1}}$  is the probability of observing the sequence of states  $i_1, \dots, i_{t+1}$ . If the dynamics  
 271 are Markovian of order  $\ell$ , then Eq. S5 is equivalent to

$$\dot{S} = \frac{1}{\ell} \sum_{i_1, \dots, i_{\ell+1}} P_{i_1, \dots, i_{\ell+1}} \log \frac{P_{i_1, \dots, i_{\ell+1}}}{P_{i_{\ell+1}, \dots, i_1}}. \quad (\text{S6})$$

272 For example, if  $\ell = 1$  we recover the Markov approximation in Eq. 1 in the main text. In gen-  
 273 eral, computing the  $\ell^{\text{th}}$ -order entropy production for a system with  $k$  states requires estimating the  
 274 probabilities of all  $k^{\ell+1}$  sequences of length  $\ell + 1$ . Thus, the number of independent statistics that  
 275 need to be estimated grows exponentially with the order  $\ell$ , often making it infeasible to estimate  
 276 the entropy production beyond order  $\ell = 1$ .

277 Despite the abovementioned limitations, here we estimate the entropy production of neural  
 278 dynamics up to order  $\ell = 5$ . In doing so, we demonstrate that our main results (Fig. 4 in the main

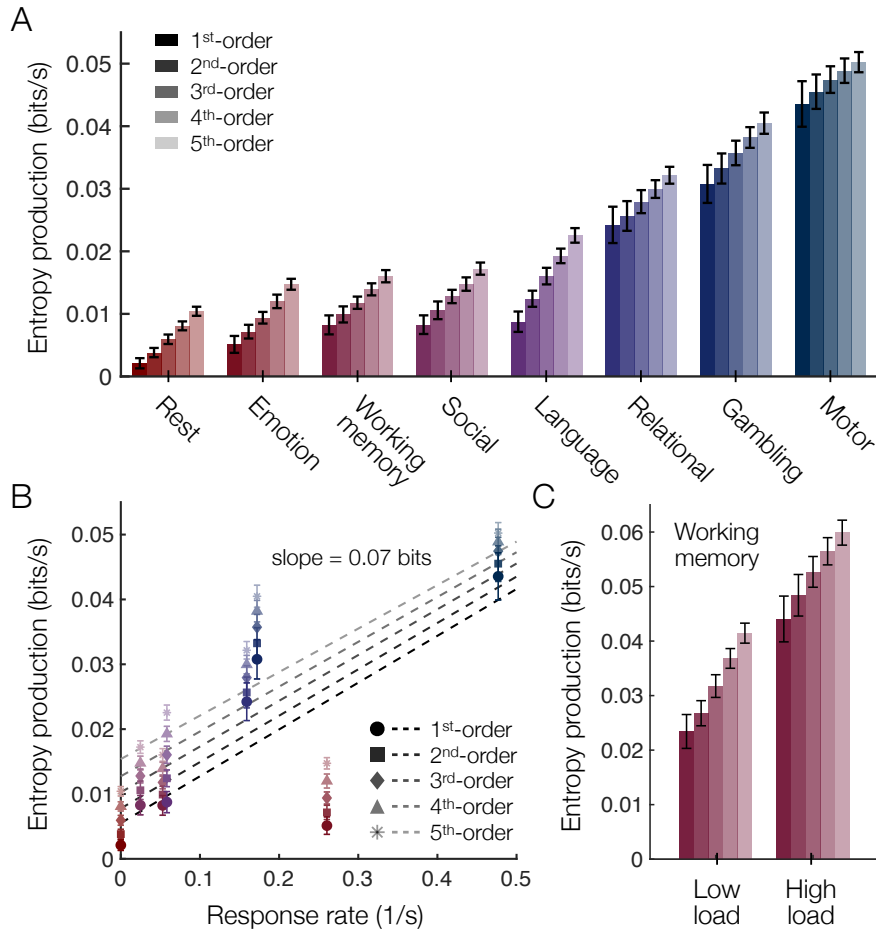

**Supporting Fig. 10 | Higher-order approximations of entropy production in the brain.**

(A) Entropy productions of orders  $\ell = 1, 2, 3, 4, 5$  computed at rest and during seven cognitive tasks. All estimates are based on the same coarse-grained states, computed using hierarchical clustering with  $k = 8$  clusters. (B) Entropy production estimates as a function of response rate for the tasks listed in panel (A). Across all orders  $\ell = 1, 2, 3, 4, 5$ , each response induces an identical 0.07 bits of produced entropy (within errors,  $p < 0.05$ ). (C) Entropy production estimates for low cognitive load and high cognitive load conditions in the working memory task, where low and high loads represent 0-back and 2-back conditions, respectively. In all panels, data points of increasing brightness indicate entropy production estimates of increasing order, and error bars reflect two standard-deviation confidence intervals that arise due to finite data (see Materials and Methods in the main text).

279 text) do not depend qualitatively on the Markov approximation in Eq. 1 in the main text. Just as  
 280 we did under the Markov approximation (Fig. 4 in the main text), we cluster the neural data using

281  $k = 8$  coarse-grained states. Given that we are now required to estimate  $k^{\ell+1}$  different probabilities  
282 (a number that grows up to  $2.6 \times 10^5$  for  $\ell = 5$ ) rather than just  $k^2 = 64$  probabilities, there are  
283 inevitably entries in the sum in Eq. S6 that are infinite (i.e., those corresponding to reverse-time  
284 sequences  $i_{\ell+1}, \dots, i_1$  that are not observed in the time-series). As is common,<sup>13,18</sup> we set these  
285 terms to zero.

286 We find that all of the higher-order approximations studied ( $\ell = 2, 3, 4, 5$ ) yield exactly the  
287 same hierarchy of entropy productions across task settings (Fig. S10A) as the first-order approxi-  
288 mation (Fig. 4A in the main text). In particular, across all orders  $\ell$ , the neural dynamics produce  
289 less entropy during rest than during each of the cognitive tasks (Fig. S10A). Moreover, the higher-  
290 order entropy productions remain significantly correlated with the frequency of physical responses  
291 in different tasks (Fig. S10B). In fact, for all orders  $\ell$  examined, each response induces an iden-  
292 tical 0.07 bits of produced entropy (within errors; Fig. S10B). Finally, in the working memory  
293 task, the higher-order entropy productions remain larger in the high cognitive load condition than  
294 in the low-load condition (Fig. S10C). Specifically, the neural dynamics produce an additional  
295 0.02 bits per second of entropy in the high-load condition compared to the low-load condition, a  
296 difference that is identical (within errors) across all of the Markov orders studied. Together, these  
297 results demonstrate that the central conclusions of the main text generalize to higher-order Markov  
298 approximations.

## 299 12 Varying the number of coarse-grained states

300 In Sec. 7, we presented methods for choosing the number of coarse-grained states  $k$ , concluding  
301 that  $k = 8$  is an appropriate choice for our neural data. However, it is important to check that the  
302 entropy production results from Fig. 4 in the main text do not vary significantly with our choice of  
303  $k$ . In Fig. S11A, we plot the estimated entropy production for each task setting (including rest) as  
304 a function of the number of coarse-grained states  $k$ . We find that the tasks maintain approximately  
305 the same ordering across all choices of  $k$  considered, with the brain producing the least entropy  
306 during rest, the most entropy during the motor task, and the second most entropy during the gam-  
307 bling task. Furthermore, we find that the correlation between entropy production and physical

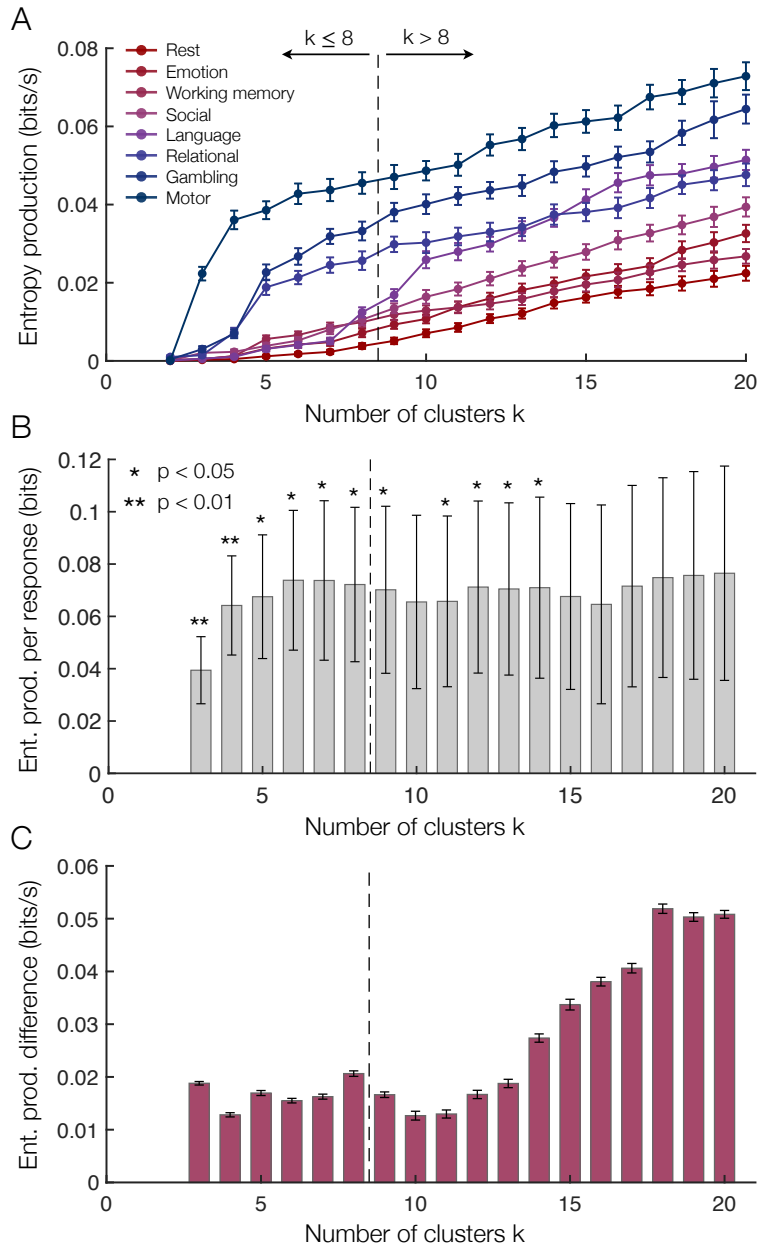

**Supporting Fig. 11 | Entropy production in the brain at different levels of coarse-graining.** (A) Entropy production at rest and during seven cognitive tasks as a function of the number of clusters  $k$  used in the hierarchical clustering. Error bars reflect two-standard-deviation confidence intervals that arise due to finite data (see Materials and Methods in the main text). (B) Slope of the linear relationship between entropy production and physical response rate across tasks for different numbers of clusters  $k$ . Error bars represent one-standard-deviation confidence intervals of the slope and asterisks indicate the significance of the Pearson correlation between entropy production and response rate. (C) Difference bet-

ween the entropy production during high-load and low-load conditions of the working memory task as a function of the number of clusters  $k$ . Error bars represent two-standard-deviation confidence intervals that arise due to finite data (see Materials and Methods in the main text), and the entropy production difference is significant across all values of  $k$  (one-sided  $t$ -test,  $p < 0.001$ ).

308 response rate (Fig. 4B in the main text) remains significant for all  $k \leq 8$  (that is, for all choices of  
309  $k$  for which we observe all transitions at least once in each task; Fig. S6A) as well as  $k = 9, 11,$   
310  $12, 13,$  and  $14$  (Fig. S11B). We remark that we do not study the case  $k = 2$  because the entropy  
311 production is zero by definition for steady-state systems with two states (Fig. S11A). Finally, we  
312 confirm that the entropy production is significantly larger during high-cognitive-load conditions  
313 than low-cognitive-load conditions in the working memory task (Fig. 4C in the main text) for all  
314 choices of  $k$  considered (Fig. S11C). Together, these results demonstrate that the relationships  
315 between entropy production and physical and cognitive effort are robust to reasonable variation in  
316 the number of coarse-grained states  $k$ .

### 317 **13 Robustness to head motion, signal variance, and block length**

318 Here, we show that the effects of physical response rate and cognitive effort on entropy produc-  
319 tion cannot be explained by head movement within the scanner (a common confound in fMRI  
320 studies<sup>19</sup>), variance in the neural time-series, nor the block lengths of different tasks. To quantify  
321 head movement, for each time point in every time-series, we compute the spatial standard devia-  
322 tion of the difference between the current image and the previous image. This quantity, known as  
323 DVARS, is a common measure of head movement in fMRI data.<sup>20</sup> Importantly, we find that entropy  
324 production is not significantly correlated with the average DVARS within each task (Fig. S12A),  
325 thereby demonstrating that the relationship between entropy production and physical response rate  
326 is not simply due to the confound of subject head movement within the scanner. Additionally,  
327 we find that entropy production is not significantly correlated with the variance of the neural data  
328 within each task (Fig. S12B). We therefore establish that our entropy production estimates are  
329 not simply driven by variations in the amount of noise in the neural data across different tasks.

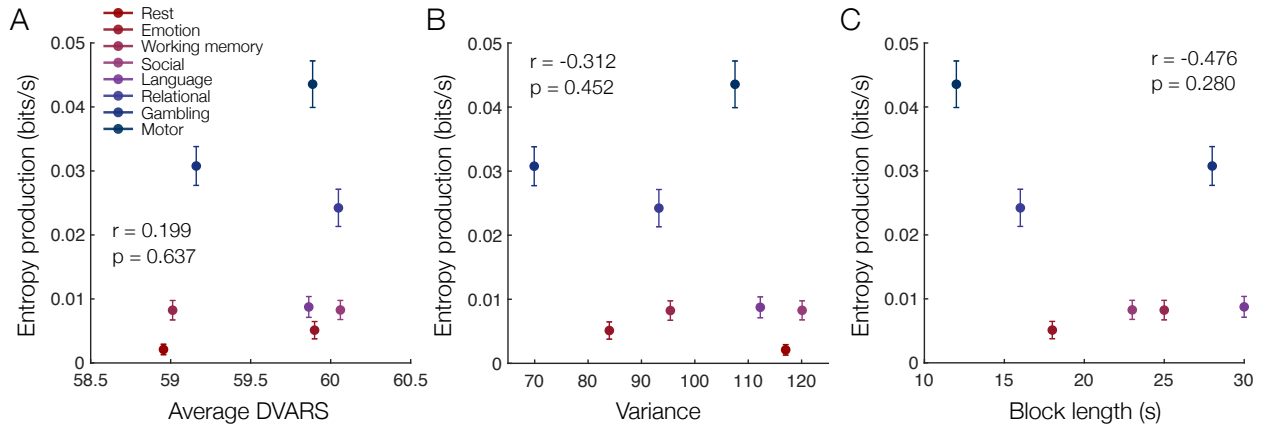

**Supporting Fig. 12 | Entropy production in the brain cannot be explained by head movement, signal variance, nor block length.** Entropy production versus the average DVARS (A), the variance of the neural time-series (B), and the lengths of task blocks (C) at rest and during seven cognitive tasks. Across all panels, entropy productions are estimated using hierarchical clustering with  $k = 8$  clusters and are divided by the fMRI repetition time  $\Delta t = 0.72$  s to compute entropy production rates. Error bars reflect two-standard-deviation confidence intervals that arise due to finite data (see Materials and Methods in the main text).

330 Finally, one might suspect that the fluxes between neural states (and therefore the entropy produc-  
 331 tion) is driven by variations in the block structure of different tasks. However, we do not find a  
 332 significant relationship between the entropy production and the lengths of blocks in different tasks  
 333 (Fig. S12C), thereby indicating that block structure alone cannot explain the observed variations  
 334 in entropy production across tasks.

## 335 14 Comparing against phase-randomized surrogate data

336 In Sec. 5, we showed that if one shuffles the order of neural time-series data (thereby destroying  
 337 the arrow of time), then the fluxes between states vanish and the system returns to detailed balance  
 338 (Fig. S4). Yet it is also interesting to consider the effect of other surrogate data techniques on  
 339 broken detailed balance. Here, we consider two such techniques: one that randomizes the phases of  
 340 neural activity while conserving both the auto-correlations and cross-correlations between regions  
 341 (referred to as the multivariate phase-randomized (MPR) surrogate), and another that randomizes  
 342 phases while conserving auto-correlations but not cross-correlations (referred to as the univariate

343 phase-randomized (UPR) surrogate).<sup>10,21</sup> Importantly, the auto-correlations are symmetric in time,  
344 while the cross-correlations are not. Therefore, randomizing the data while holding only the auto-  
345 correlations fixed (as in the UPR surrogate) should destroy the arrow of time and return the system  
346 to detailed balance. By contrast, holding the cross-correlations fixed (as in the MPR surrogate)  
347 should ensure that some of the broken detailed balance remains from the original data.

348 Here, we compute the entropy productions of MPR and UPR surrogate data during the seven  
349 cognitive tasks and rest. For the MPR data, we find that the entropy production (and therefore the  
350 distance from detailed balance) remains significant, but is reduced relative to the original data (Fig.  
351 S13A). Meanwhile, for the UPR data, the entropy production nearly vanishes and the data obeys  
352 detailed balance (Fig. S13B). Indeed, for the MPR data, we still find significant (yet reduced) in-  
353 creases in entropy production with both physical response rate (Fig. S13B) and cognitive load (Fig.  
354 S13C), while we find no such dependencies in the UPR data. Together, these results confirm that  
355 randomizing the data while holding the auto-correlations fixed returns the system to detailed bal-  
356 ance, whereas holding the cross-correlations fixed preserves some of the broken detailed balance  
357 in the original data.

## 358 15 Data processing

359 The resting, emotional processing, working memory, social inference, language processing, rela-  
360 tional matching, gambling, and motor execution fMRI scans are from the S1200 Human Connec-  
361 tome Project release.<sup>22,23</sup> Brains were normalized to fsLR32k via the MSM-AII registration with 100  
362 regions.<sup>24</sup> CompCor, with five principal components from the ventricles and white matter masks,  
363 was used to regress out nuisance signals from the time series. Additionally, the 12 detrended mo-  
364 tion estimates provided by the Human Connectome Project were regressed out from the regional  
365 time series. The mean global signal was removed and then time series were band-pass filtered  
366 from 0.009 to 0.08 Hz. Then, frames with greater than 0.2 mm frame-wise displacement or a  
367 derivative root mean square (DVARs) above 75 were removed as outliers. We filtered out sessions  
368 composed of greater than 50 percent outlier frames, and we only analyzed data from subjects that  
369 had all scans remaining after filtering, leaving 590 individuals. The processing pipeline used here

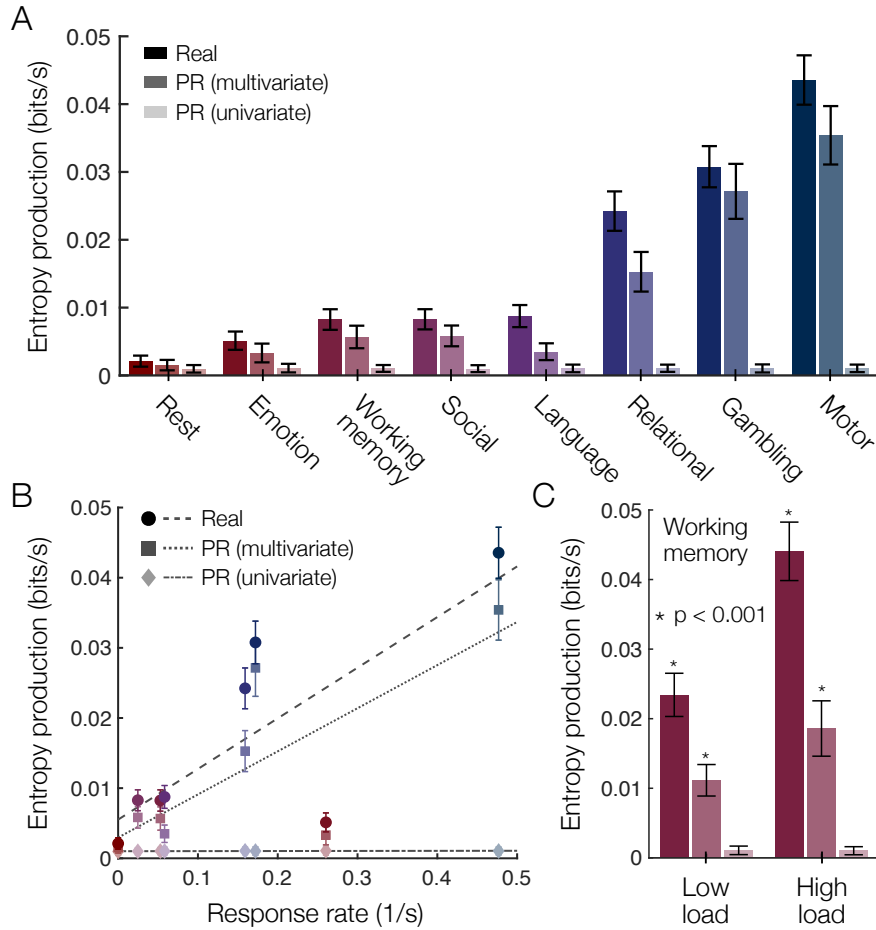

**Supporting Fig. 13 | Entropy production of phase-randomized surrogate data.** (A) Entropy productions of the true data (dark shades), multivariate phase-randomized (MPR) data (medium shades), and univariate phase-randomized (UPR) data (light shades) during rest and seven cognitive tasks. (B) Entropy production estimates as functions of response rate for the tasks listed in panel (A), where lines indicate linear best fits. For the real and MPR data, responses induce significant entropy production: 0.07 bits per response for real data ( $p = 0.02$ ) and 0.06 bits per response for MPR data ( $p = 0.03$ ). For UPR data, we do not find a significant increase in entropy production with responses ( $p = 0.12$ ). (C) Entropy production estimates for low cognitive load and high cognitive load conditions in the working memory task, where low and high loads represent 0-back and 2-back conditions, respectively. We find significant differences in entropy production between the low- and high-load conditions for both the true data (dark shade) and MPR data (medium shade), but not the UPR data (light shade). In all panels, estimates are computed using  $k = 8$  coarse-grained states, and error bars reflect two standard-deviation confidence intervals computed using 100 bootstrap samples.



370 has previously been suggested to be ideal for removing false relations between neural dynamics  
371 and behavior.<sup>25</sup> Finally, for each subject and each scan, we only analyze the first 176 time points,  
372 corresponding to the length of the shortest task (emotional processing); this truncation controls for  
373 the possibility of data size affecting comparisons across tasks.

## References

374  
376  
378  
379  
380  
381  
382  
383  
384  
385  
386  
387  
388  
389  
390  
391  
392  
393  
394  
395  
396  
397

1. Seifert, U. Stochastic thermodynamics, fluctuation theorems and molecular machines. *Rep. Prog. Phys.* **75**, 126001 (2012).
2. Evans, D. J., Cohen, E. G. D. & Morriss, G. P. Probability of second law violations in shearing steady states. *Phys. Rev. Lett.* **71**, 2401 (1993).
3. Dieterich, E., Camunas-Soler, J., Ribezzi-Crivellari, M., Seifert, U. & Ritort, F. Single-molecule measurement of the effective temperature in non-equilibrium steady states. *Nat. Phys.* **11**, 971–977 (2015).
4. Esposito, M. Stochastic thermodynamics under coarse graining. *Phys. Rev. E* **85**, 041125 (2012).
5. Jain, A. K., Murty, M. N. & Flynn, P. J. Data clustering: A review. *ACM Comput. Surv.* **31**, 264–323 (1999).
6. Battle, C. *et al.* Broken detailed balance at mesoscopic scales in active biological systems. *Science* **352**, 604–607 (2016).
7. Cunningham, J. P. & Byron, M. Y. Dimensionality reduction for large-scale neural recordings. *Nat. Neurosci.* **17**, 1500 (2014).
8. Song, X., Ji, T. & Wyrwicz, A. M. Baseline drift and physiological noise removal in high field fMRI data using kernel PCA. In *2008 IEEE International Conference on Acoustics, Speech and Signal Processing*, 441–444 (IEEE, 2008).
9. Liegeois, R., Laumann, T. O., Snyder, A. Z., Zhou, J. & Yeo, B. T. Interpreting temporal fluctuations in resting-state functional connectivity MRI. *Neuroimage* **163**, 437–455 (2017).
10. Lancaster, G., Iatsenko, D., Pidde, A., Ticcinelli, V. & Stefanovska, A. Surrogate data for hypothesis testing of physical systems. *Phys. Rep.* **748**, 1–60 (2018).

- 398 11. Martínez, I. A., Bisker, G., Horowitz, J. M. & Parrondo, J. M. Inferring broken detailed  
399 balance in the absence of observable currents. *Nat. Commun.* **10**, 1–10 (2019).
- 400 12. Seifert, U. Entropy production along a stochastic trajectory and an integral fluctuation theo-  
401 rem. *Phys. Rev. Lett.* **95**, 040602 (2005).
- 402 13. Roldán, É. & Parrondo, J. M. Estimating dissipation from single stationary trajectories. *Phys.*  
403 *Rev. Lett.* **105**, 150607 (2010).
- 404 14. Cohen-Addad, V., Kanade, V., Mallmann-Trenn, F. & Mathieu, C. Hierarchical clustering:  
405 Objective functions and algorithms. In *Proceedings of the Twenty-Ninth Annual ACM-SIAM*  
406 *Symposium on Discrete Algorithms*, 378–397 (SIAM, 2018).
- 407 15. Thomas Yeo, B. *et al.* The organization of the human cerebral cortex estimated by intrinsic  
408 functional connectivity. *J. Neurophysiol.* **106**, 1125–1165 (2011).
- 409 16. Fox, M. D., Corbetta, M., Snyder, A. Z., Vincent, J. L. & Raichle, M. E. Spontaneous neuronal  
410 activity distinguishes human dorsal and ventral attention systems. *Proc. Natl. Acad. Sci.* **103**,  
411 10046–10051 (2006).
- 412 17. Vossel, S., Geng, J. J. & Fink, G. R. Dorsal and ventral attention systems: Distinct neural  
413 circuits but collaborative roles. *Neuroscientist* **20**, 150–159 (2014).
- 414 18. Roldán, É. & Parrondo, J. M. Entropy production and Kullback-Leibler divergence between  
415 stationary trajectories of discrete systems. *Phys. Rev. E* **85**, 031129 (2012).
- 416 19. Friston, K. J., Williams, S., Howard, R., Frackowiak, R. S. & Turner, R. Movement-related  
417 effects in fMRI time-series. *Magn. Reson. Med.* **35**, 346–355 (1996).
- 418 20. Power, J. D., Barnes, K. A., Snyder, A. Z., Schlaggar, B. L. & Petersen, S. E. Spurious but  
419 systematic correlations in functional connectivity MRI networks arise from subject motion.  
420 *Neuroimage* **59**, 2142–2154 (2012).
- 421 21. Prichard, D. & Theiler, J. Generating surrogate data for time series with several simultaneously  
422 measured variables. *Phys. Rev. Lett.* **73**, 951 (1994).

- 423 22. Barch, D. M. *et al.* Function in the human connectome: Task-fMRI and individual differences  
424 in behavior. *Neuroimage* **80**, 169–189 (2013).
- 425 23. Van Essen, D. C. *et al.* The WU-Minn Human Connectome Project: An overview. *Neuroimage*  
426 **80**, 62–79 (2013).
- 427 24. Schaefer, A. *et al.* Local-global parcellation of the human cerebral cortex from intrinsic func-  
428 tional connectivity MRI. *Cereb. Cortex* **28**, 3095–3114 (2018).
- 429 25. Siegel, J. S. *et al.* Data quality influences observed links between functional connectivity and  
430 behavior. *Cereb. Cortex* **27**, 4492–4502 (2017).
